# Supplementary material for: Luminescence emission-modulated based on specific two-photon compound of triazole-conjugated pyrene derivative
Source: Royal Society of Chemistry journal article supplement (doi:10.1039/c7ra02406a), 2017-01-01
Supplement: c7ra02406a1.pdf [file c7ra02406a1.pdf]

# Supplementary Information

## Luminescence Emission -Modulated based on specific two-photon compound of triazole- conjugated pyrene derivative

*Huiying Liu<sup>a</sup>, , Lei Wang<sup>b</sup>, Yishi Wu<sup>b\*</sup>, and Qing Liao<sup>c\*</sup>*

<sup>a</sup> College of Material Science and Engineering, Beijing Institute of Fashion Technology, Beijing 10029, P. R. China

Fax: +86-10-64288045; Tel: +86-10-64288045

E-mail: liuhuiying@iccas.ac.cn

<sup>b</sup> Beijing National Laboratory for Molecular Sciences (BNLMS), Institute of Chemistry, Chinese Academy of Sciences, Beijing 100190, P.R. China.

E-mail: yswu@iccas.ac.cn

<sup>c</sup> Beijing Key Laboratory for Optical Materials and Photonic Devices, Department of Chemistry, Capital Normal University, Beijing, 100048, P. R. China.

E-mail: liaoqing@iccas.ac.cn

## Contents

1. Synthesis of 1,6-di(1-butyl-1H-1,2,3-triazol-4-yl)pyrene (DTP)
2. Single crystal X-ray diffraction data of DTP
3. Two-photon-excited fluorescence spectra of DTP
- 4 Representative PL image of DTP nanowires prepared using different anti-solvent.
5. General characterization method of the DTP molecule and DTP nanowires
6. AFM image and the corresponding cross section of a single DTP nanowire.
7. Fluorescence decay profiles of DTP monomers in  $\text{CH}_2\text{Cl}_2$  solution and wires

## 1. Synthesis of 1,6-di(1-butyl-1*H*-1,2,3-triazol-4-yl)pyrene (DTP).

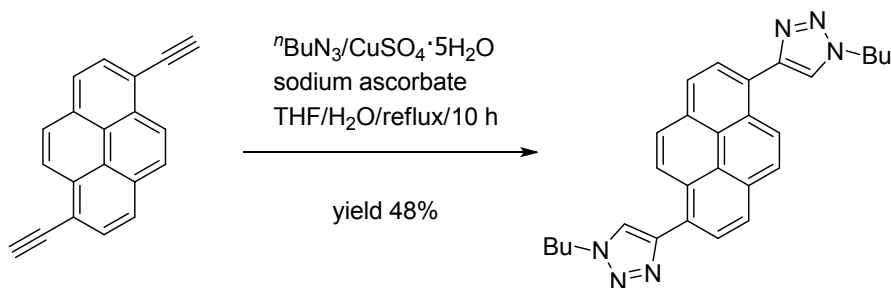

**Scheme S1** Synthesis of DTP via CuAAC reaction.

The solution of THF (5 mL) and  $\text{H}_2\text{O}$  (2 mL) were added a flask of 58 mg of 1,6-diethynylpyrene (0.232 mmol), 92 mg of  $n\text{BuN}_3$  (0.93 mmol), 9 mg of  $\text{CuSO}_4 \cdot 5\text{H}_2\text{O}$  (0.036 mmol) and 14 mg of sodium ascorbate (0.071 mmol) under  $\text{N}_2$  atmosphere. The mixture was heated to 70 °C with vigorous stirring for 12 h. Then the solution was extracted with  $\text{CH}_2\text{Cl}_2$ , and the combined organic phase was dried with anhydrous  $\text{MgSO}_4$ . After the solvent was removed, the residue was purified by column chromatography on a silica gel using  $\text{CH}_2\text{Cl}_2/\text{EtOAc}$  (v/v) 10:1 as eluent. The product was obtained as yellowish solid (50 mg, 48% yield).  $^1\text{H}$  NMR (400 MHz,  $\text{CDCl}_3$ ):  $\delta$  8.73 (d,  $J$  = 5.6 Hz, 2H), 8.25 (m, 4H), 8.13 (d,  $J$  = 5.6 Hz, 2H), 7.96 (s, 2H), 4.55 (t,  $J$  = 3.6 Hz, 4H), 2.06 (m, 4H), 1.51 (m, 4H), 1.04 (t,  $J$  = 5.4 Hz, 6H). EI-MS:  $m/z$  calcd for  $\text{C}_{28}\text{H}_{28}\text{N}_6$  448.2, found 488. EI-HRMS: calcd 448.2375 for  $\text{C}_{28}\text{H}_{28}\text{N}_6$ , found 448.2380.

## 2. Single crystal X-ray diffraction data of DTP

Single crystal of DTP was prepared by slow diffusion of toluene to the THF solution at room temperature. The diffraction experiments were carried out on a Bruker SMART CCD diffractometer equipped with a graphite-monochromated Mo- $K\alpha$  radiation ( $\lambda$  = 0.71073 Å). The data were collected at 173(2) K. Empirical absorption correlations were applied automatically. The structure was solved with direct method and refined with a full-matrix least-squares technique using the SHELXL-97 program. The space group was determined from the systematic absence and its correctness was confirmed by successful solution and refinement of structure. Anisotropic thermal parameters were refined for all the non-hydrogen atoms. The hydrogen atoms were added in idealized position and refined with isotropic displacement. Crystal data refinement conditions and experimental details were tabulated in Table. S1.

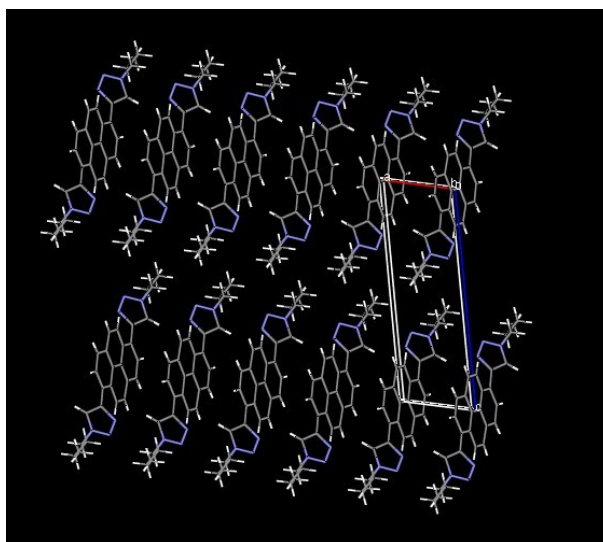

**Figure S1** Molecular packing mode in the ac plane of the DTP crystal.

**Table. S1** Crystal data and structure refinement for DTP

| Identification code               | DTP                                                                                                                                |
|-----------------------------------|------------------------------------------------------------------------------------------------------------------------------------|
| Empirical formula                 | C <sub>28</sub> H <sub>28</sub> N <sub>6</sub>                                                                                     |
| Formula weight                    | 448.56                                                                                                                             |
| Temperature                       | 173(2) K                                                                                                                           |
| Wavelength                        | 0.71073 Å                                                                                                                          |
| Crystal system, space group       | Triclinic, P-1                                                                                                                     |
| Unit cell dimensions              | a = 5.4723(11) Å    alpha = 95.14(3) deg.<br>b = 7.4854(15) Å    beta = 99.93(3) deg.<br>c = 15.507(3) Å    gamma = 110.92(3) deg. |
| Volume                            | 576.5(2) Å <sup>3</sup>                                                                                                            |
| Z, Calculated density             | 1, 1.292 Mg/m <sup>3</sup>                                                                                                         |
| Absorption coefficient            | 0.079 mm <sup>-1</sup>                                                                                                             |
| F(000)                            | 238                                                                                                                                |
| Crystal size                      | 0.30 x 0.20 x 0.09 mm                                                                                                              |
| Theta range for data collection   | 2.70 to 27.48 deg.                                                                                                                 |
| Limiting indices                  | -7 ≤ h ≤ 7, -9 ≤ k ≤ 9, -20 ≤ l ≤ 20                                                                                               |
| Reflections collected / unique    | 7497 / 2612 [R(int) = 0.0697]                                                                                                      |
| Completeness to theta = 27.48     | 99.2 %                                                                                                                             |
| Absorption correction             | Semi-empirical from equivalents                                                                                                    |
| Max. and min. transmission        | 1.0000 and 0.4294                                                                                                                  |
| Refinement method                 | Full-matrix least-squares on F <sup>2</sup>                                                                                        |
| Data / restraints / parameters    | 2612 / 0 / 155                                                                                                                     |
| Goodness-of-fit on F <sup>2</sup> | 1.077                                                                                                                              |
| Final R indices [I > 2sigma(I)]   | R1 = 0.0603, wR2 = 0.1367                                                                                                          |
| R indices (all data)              | R1 = 0.0752, wR2 = 0.1450                                                                                                          |
| Largest diff. peak and hole       | 0.271d -0.225 e. Å <sup>-3</sup>                                                                                                   |

### 3. Two-photon-excited fluorescence spectra

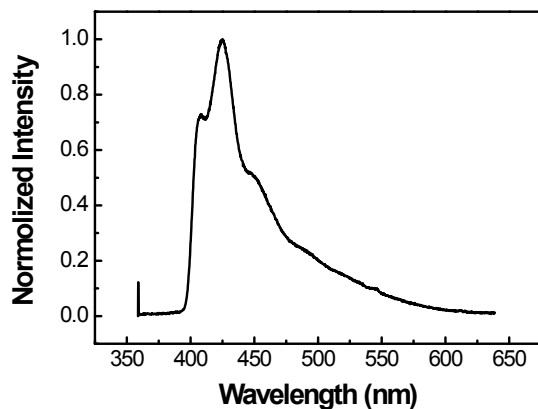

**Figure. S2** Normalized two-photon-excited fluorescence spectra of DTP in  $\text{CH}_2\text{Cl}_2$ . The excited wavelength is 740 nm.

### 4. Representative PL image of DTP nanowires prepared using different anti-solvent.

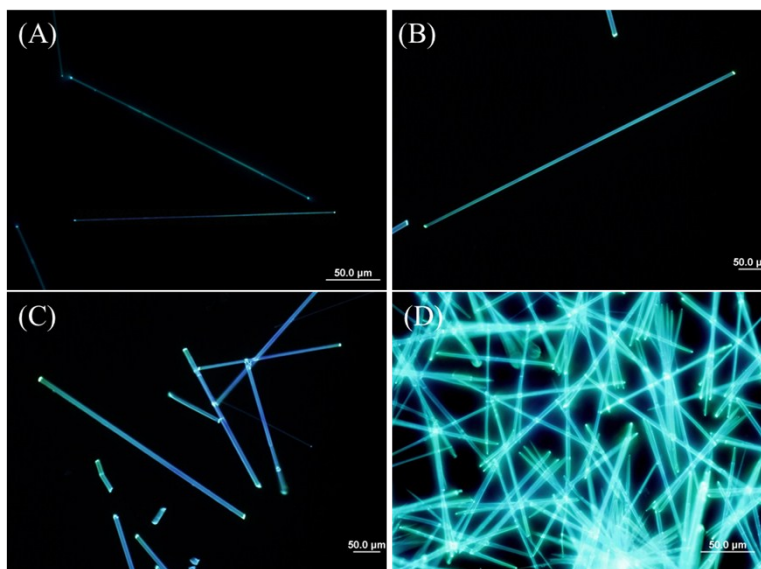

**Figure. S3** Representative PL image of DTP nanowires prepared using different anti-solvent.

(A) toluene; (B) MeOH; (C) EtOH; (D) MeCN.

### 5. General characterization method of the DTP molecule and DTP nanowires

NMR spectra were recorded in the designated solvent on a Bruker Avance 400 MHz spectrometer. Spectra are reported in ppm values from residual protons of deuterated solvent for  $^1\text{H}$  NMR ( $\delta$  7.26 ppm for  $\text{CDCl}_3$ ). MS data were obtained with a Bruker Daltonics Inc. ApexII FT-ICR mass spectrometer. 1,6-diethynylpyrene<sup>1</sup> and n-butyl azide<sup>2</sup> were prepared

according to known procedures. UV-Vis spectra were obtained using a TU-1810DSPC spectrometer of Beijing Purkinje General Instrument Co. Ltd. at room temperature in denoted solvents with a conventional 1.0 cm quartz cell.

The DTP nanowires were characterized by SEM (HITACHI S-4300), TEM (Tecnai G2 F20 U-TWIN), and photoluminescence (PL) spectra (HITACHI F-4500). AFM images and cross section profiles were taken on a Bruker Peak Force QNM atom force microscopy. PL images were taken with an Olympus F-1000 inverted microscope by exciting the samples with the UV band (330-380 nm) of a mercury lamp. The XRD patterns were obtained using ESCALAB220i-XL X-ray diffraction photometer.

To measure the micro-area PL spectra of single nanowires, the nanowires on a glass substrate were excited with a focused laser ( $\lambda=408$  nm). The laser was focused down to the diffraction limit to excite the nanowire locally. A confocal microscopy setup was used to selectively collect the emission from the end of the nanowire with a 100  $\mu\text{m}$  pinhole. The excitation laser was filtered with a 400 nm short pass filter. The PL lifetimes of single wires were taken with a Hamamatsu streak camera (C5680, Hamamatsu Photonics).

TPA cross section was determined from two-photon-induced fluorescence with Rhodamine B as a reference. A regenerative amplifier (Spitfire, Spectra Physics) seeded with a mode-locked Ti:sapphire laser (Tsunami, Spectra Physics) generated laser pulses of about 120 fs at a wavelength of 795 nm, which were used to drive an optical parametric amplifier (OPA-800CF, Spectra Physics) to obtain a tunable laser in the range of ca. 690–850 nm. The laser beam was focused into a quartz cuvette having an optical path length of 10 mm. The two-photon-induced fluorescence was collected with a right-angle geometry and detected with a liquid-nitrogen-cooled charge coupled device (CCD) detector (SPEC-10-400B/LbN, Roper Scientific) attached to a polychromator (Spectropro-550i, Acton).

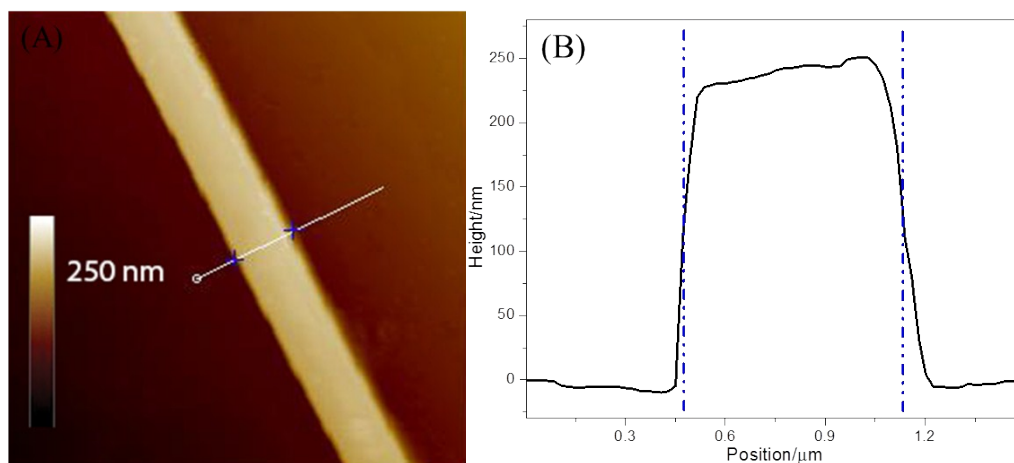

**Figure. S4** Atomic force microscopy image (A) and the corresponding cross section profile (B) of a single DTP nanowire.

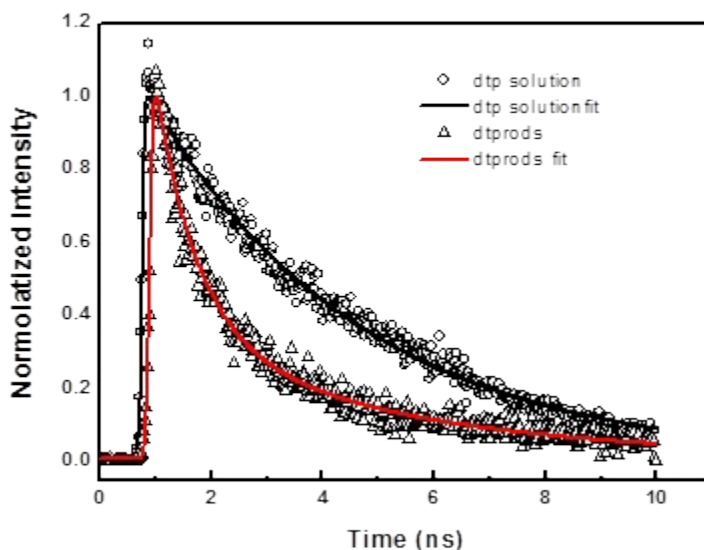

| DTP      | $\Phi_f$ | $\tau$ | $K_f$             |
|----------|----------|--------|-------------------|
| Solution | 0.99     | 3.85   | $2.6 \times 10^8$ |
| Wires    | 0.21     | 1.39   | $1.4 \times 10^8$ |

**Figure. S5** PL decay profiles of DTP single crystal nanowires at 430 nm under different pumping energies, solution in CH<sub>2</sub>Cl<sub>2</sub> (black circle) and wires (black triangle), respectively. The excitation wavelength is 400 nm. The curve of solution in CH<sub>2</sub>Cl<sub>2</sub> can be fitted by a single exponential function, giving rise to  $\tau = 3.85$  ns. The nanowire curves can be fitted by a double-exponential function, giving rise to  $\tau_1 = 0.75$  ns (67.9%) and  $\tau_2 = 4.02$  ns (22.1%) ( $\tau_{\text{average}} = 1.39$  ns )

## Reference

1. Venkataramana, G.; Sankararaman, S. *Eur. J. Org. Chem.* 2005, 4162.
2. Boyer, J. H.; Hamer, J. *J. Am. Chem. Soc.* 1955, **77**, 951.
